# Supplementary material
Source: HighWire-hosted journal article supplement (https://www.annfammed.org/highwire/filestream/8046/field_highwire_adjunct_files/0/DAppendix_1.pdf)
Supplement: DAppendix_1.pdf [file DAppendix_1.pdf]

Dietrich A, Oxman T, Williams J, et al. Going to scale: re-engineering systems for primary care treatment of depression. *Ann Fam Med*. 2004;2:301-304.

<http://www.annfammed.org/cgi/content/full/2/4/301/DC1>

---

## Appendix 1. The MacArthur Initiative

In 1995 the John D. and Catherine T. MacArthur Foundation launched its Initiative on Depression and Primary Care. Initial studies explored current depression management practices in primary care,<sup>1-9</sup> developed a skills training program for clinicians<sup>10</sup> as well as a depression management tool kit (<http://www.depression-primarycare.org>), and tested the efficacy of therapies for chronic and subthreshold depression.<sup>11,12</sup> These projects, along with evidence from recent research trials, provide the foundation for developing and testing depression management clinical models in primary care that could be widely implemented. Subsequent work of the initiative has included a randomized controlled trial described here, with sustainability and dissemination studies to follow.

### References

1. Dietrich AJ. The telephone as a new weapon in the battle against depression. *Eff Clin Pract*. 2000;4:191-193.
2. Nutting PA, Rost K, Dickinson M, et al. Barriers to initiating depression treatment in primary care practice. *J Gen Intern Med*. 2002;17:103-111.
3. Solberg LI, Fischer LR, Wei F, et al. A CQI intervention to change the care of depression: a controlled study. *Eff Clin Pract*. 2001;4:239-249.
4. Kroenke K, Taylor-Vaisey A, Dietrich AJ, Oxman TE. Interventions to improve provider diagnosis and treatment of mental disorders in primary care: a critical review of the literature. *Psychosomatics* 2000;41:39-50.
5. Learman LA, Gerrity MS, Field DR, van Blaricom A, Romm J, Choe J. Effects of a depression education program on residents' knowledge, attitudes, and clinical skills. *Obstet Gynecol*. 2003;101:167-174.
6. Oxman TE, Dietrich AJ, Williams JW, Kroenke K. The Three Component Model of depression management in primary care. *Psychosomatics*. 2002;43:441-450.
7. Williams JW, Rost K, Dietrich JW, Ciotti MC, Zyzanski SJ, Cornell J. Primary care physicians' approach to depressive disorders: Effects of physician specialty and practice structure. *Arch Fam Med*. 1999;8:58-67.
8. Gerrity MS, Cole SA, Dietrich AJ, Barrett JE. Improving the recognition and management of depression. Is there a role for physician education? *J Fam Pract*. 1999;48:949-957.
9. Gerrity MS, Williams JW, Dietrich AJ, Olson AL. Identifying physicians likely to benefit from depression education: a challenge for health care organizations. *Med Care*. 2001;39:856-866.
10. Cole S, Raju M, Barrett J, Gerrity M, Dietrich A. MacArthur Foundation depression education for primary care physicians: background, participant's workbook, and facilitator's guide. *Gen Hosp Psychiatry*. 2000;22:299-358.
11. Williams JW, Barrett J, Oxman T, et al. Treatment of dysthymia and minor depression in primary care: A randomized controlled trial in older adults. *JAMA*. 2000;284:1519-1526.
12. Barrett JE, Williams JW, Oxman TE, et al. Treatment of dysthymia and minor depression in primary care. A randomized trial in patients aged 18 to 59 years. *J Fam Pract*. 2001;50:405-412.
